# Supplementary material for: Fluorescence detection of aromatic amines and photocatalytic degradation of rhodamine B under UV light irradiation by luminescent metal–organic frameworks
Source: Royal Society of Chemistry journal article supplement (doi:10.1039/c4nj02356k), 2015-01-01
Supplement: c4nj02356k1.pdf [file c4nj02356k1.pdf]

**Fluorescence Detection of Aromatic Amines and Photocatalytic  
Degradation of Rhodamine B under UV light irradiation by  
Luminescent Metal-Organic Frameworks**

**Fengqin Wang**\*<sup>[a]</sup>, **Caifu Dong** <sup>[a]</sup>, **Chengmiao Wang** <sup>[a]</sup>, **Zongchao Yu** <sup>[a]</sup>, **Shukun Guo** <sup>[b]</sup>,  
**Zechuan Wang** <sup>[a]</sup>, **Yongnan Zhao** <sup>[b]</sup>, **Guodong Li** <sup>[c]</sup>

*<sup>a</sup>College of Environmental and Chemical Engineering & Key Lab of Hollow Fiber Membrane  
Materials & Membrane Process, Tianjin Polytechnic University, Tianjin 300387, China*

*<sup>b</sup>School of Materials Science and Engineering & Tianjin Key Lab of Fiber Modification and  
Functional Fiber, Tianjin Polytechnic University, Tianjin 300387, China*

*<sup>c</sup>The State Key Laboratory of Inorganic Synthesis and Preparative Chemistry, Jilin  
University, 130023, China*

E-mail: [wangfengqin@tjpu.edu.cn](mailto:wangfengqin@tjpu.edu.cn) Tel: (+86)-22-83955457

New Journal of Chemistry

**Supplementary**

Table S1 Crystal data and structure refinement for **1** and **2**

| Compound                                           | <b>1</b>                                         | <b>2</b>                                         |
|----------------------------------------------------|--------------------------------------------------|--------------------------------------------------|
| Chemical formula                                   | C <sub>8</sub> H <sub>7</sub> NO <sub>5</sub> Zn | C <sub>8</sub> H <sub>11</sub> CdNO <sub>7</sub> |
| Formula weight                                     | 262.51                                           | 345.58                                           |
| Temperature [K]                                    | 293(2)                                           | 113(2)                                           |
| Wavelength[Å]                                      | 0.71073                                          | 0.71073                                          |
| Crystal system                                     | Monoclinic                                       | Triclinic                                        |
| Space group                                        | P2(1)/n                                          | P-1                                              |
| a[Å]                                               | 9.0342(18)                                       | 7.7683(16)                                       |
| b[Å]                                               | 8.2698(17)                                       | 8.6089(17)                                       |
| c[Å]                                               | 11.623(2)                                        | 8.6695(17)                                       |
| $\alpha$ [°]                                       | 90                                               | 84.04(3)                                         |
| $\beta$ [°]                                        | 100.90(3)                                        | 76.23(3)                                         |
| $\gamma$ [°]                                       | 90                                               | 66.04(3)                                         |
| Volume [Å <sup>3</sup> ]                           | 852.7(3)                                         | 514.56(18)                                       |
| Z, Calculated density[Mg/m <sup>3</sup> ]          | 4, 2.045                                         | 2, 2.230                                         |
| Absorption coefficient[mm <sup>-1</sup> ]          | 2.880                                            | 2.148                                            |
| Theta range for data collection (deg)              | 2.63 to 27.89                                    | 2.42 to 27.87                                    |
| Limiting indices                                   | -11 ≤ h ≤ 11, -10 ≤ k ≤ 10,<br>-13 ≤ l ≤ 15      | -8 ≤ h ≤ 10, -11 ≤ k ≤ 11,<br>-11 ≤ l ≤ 10       |
| F(000)                                             | 528                                              | 340                                              |
| Reflections collected/unique                       | 8135 / 2027 [ <i>R</i> (int) = 0.0291]           | 5113 / 2395 [ <i>R</i> (int) = 0.0256]           |
| Data / restraints / parameters                     | 2027 / 6 / 148                                   | 2395 / 12 / 178                                  |
| Goodness-of-fit on <i>F</i> <sup>2</sup>           | 1.085                                            | 1.059                                            |
| Final <i>R</i> indices[ <i>I</i> > 2σ( <i>I</i> )] | <i>R</i> 1 = 0.0270, <i>wR</i> 2 = 0.0730        | <i>R</i> 1 = 0.0222, <i>wR</i> 2 = 0.0581        |
| <i>R</i> indices (all data)                        | <i>R</i> 1 = 0.0321, <i>wR</i> 2 = 0.0747        | <i>R</i> 1 = 0.0239, <i>wR</i> 2 = 0.0584        |
| Largest diff. peak and hole[e.Å <sup>-3</sup> ]    | 0.399 and -0.627                                 | 0.501 and -0.985                                 |

Table S2. Selected bond lengths and angles for **1** and **2**(Å, °)

| <b>1</b>            |            |                     |            |
|---------------------|------------|---------------------|------------|
| Zn(1)-O(2)#1        | 1.9570(16) | Zn(1)-O(5)          | 1.9636(18) |
| Zn(1)-O(4)#2        | 1.9756(15) | Zn(1)-N(1)          | 2.0363(18) |
| O(2)#1-Zn(1)-O(5)   | 109.50(7)  | O(2)#1-Zn(1)-O(4)#2 | 94.77(6)   |
| O(5)-Zn(1)-O(4)#2   | 110.23(7)  | O(2)#1-Zn(1)-N(1)   | 104.85(7)  |
| O(5)-Zn(1)-N(1)     | 118.10(7)  | O(4)#2-Zn(1)-N(1)   | 116.38(7)  |
| <b>2</b>            |            |                     |            |
| Cd(1)-O(1)          | 2.239(2)   | Cd(1)-O(5)          | 2.2614(18) |
| Cd(1)-O(2)#1        | 2.287(2)   | Cd(1)-O(4)#2        | 2.3339(18) |
| Cd(1)-N(1)#3        | 2.417(2)   | Cd(1)-O(3)#2        | 2.452(2)   |
| O(1)-Cd(1)-O(5)     | 132.84(7)  | O(1)-Cd(1)-O(2)#1   | 100.66(7)  |
| O(5)-Cd(1)-O(2)#1   | 87.94(7)   | O(1)-Cd(1)-O(4)#2   | 84.99(7)   |
| O(5)-Cd(1)-O(4)#2   | 142.00(7)  | O(2)#1-Cd(1)-O(4)#2 | 87.82(7)   |
| O(1)-Cd(1)-N(1)#3   | 86.46(8)   | O(5)-Cd(1)-N(1)#3   | 85.27(7)   |
| O(2)#1-Cd(1)-N(1)#3 | 172.41(6)  | O(4)#2-Cd(1)-N(1)#3 | 95.46(7)   |
| O(1)-Cd(1)-O(3)#2   | 137.78(7)  | O(5)-Cd(1)-O(3)#2   | 87.61(7)   |
| O(2)#1-Cd(1)-O(3)#2 | 90.82(7)   | O(4)#2-Cd(1)-O(3)#2 | 54.72(6)   |
| N(1)#3-Cd(1)-O(3)#2 | 85.54(7)   |                     |            |

Symmetry transformations used to generate equivalent atoms:

For **1** #1  $x+1/2, -y+1/2, z-1/2$  #2  $x, y-1, z$

For **2** #1  $-x+1, -y+1, -z$  #2  $x+1, y, z-1$  #3  $-x, -y+2, -z$

Table S3 Hydrogen bonds geometries (nm, °) for **1** and **2**

| <b>1</b>            |           |           |          |           |                       |
|---------------------|-----------|-----------|----------|-----------|-----------------------|
| D-H...A             | d(D-H)    | d(H...A)  | (D... A) | ∠DHA      | Symmetry code         |
| N(1)-H(1A)...O(2)#5 | 0.895(9)  | 2.155(14) | 2.981(3) | 153.1(19) | -x+1/2, y-1/2, -z+3/2 |
| N(1)-H(1B)...O(4)#6 | 0.892(9)  | 2.387(18) | 2.998(2) | 125.8(15) | -x+1, -y+1, -z+1      |
| N(1)-H(1B)...O(1)#1 | 0.892(9)  | 2.476(16) | 3.134(2) | 131.0(17) | x+1/2, -y+1/2, z-1/2  |
| O(5)-H(5A)...O(1)#7 | 0.844(9)  | 1.829(11) | 2.660(2) | 168(2)    | -x, -y, -z+1          |
| O(5)-H(5B)...O(3)#8 | 0.840(9)  | 1.804(10) | 2.641(2) | 175(2)    | -x, -y+1, -z+1        |
| <b>2</b>            |           |           |          |           |                       |
| O(6)-H(6A)...O(2)   | 0.847(10) | 2.11(2)   | 2.860(3) | 148(3)    | -x+1, -y+1, -z        |
| N(1)-H(1A)...O(6)#5 | 0.900(9)  | 2.108(10) | 2.992(3) | 167(2)    | x, y+1, z             |
| N(1)-H(1B)...O(3)#5 | 0.893(9)  | 2.60(2)   | 3.224(3) | 128(2)    | x, y+1, z             |
| O(5)-H(5A)...O(3)#6 | 0.855(9)  | 1.848(10) | 2.701(3) | 174(3)    | -x, -y+1, -z          |
| O(6)-H(6A)...O(6)#6 | 0.847(10) | 2.45(4)   | 2.907(6) | 114(3)    | -x, -y+1, -z          |
| O(5)-H(5B)...O(7)#7 | 0.853(10) | 1.911(14) | 2.732(3) | 161(2)    | x, y, z-1             |
| O(6)-H(6B)...O(7)#7 | 0.848(10) | 2.029(16) | 2.846(4) | 161(3)    | x, y, z-1             |
| O(7)-H(7A)...O(7)#8 | 0.838(10) | 2.13(2)   | 2.805(5) | 137(3)    | -x+1, -y, -z+2        |
| O(7)-H(7B)...O(1)#9 | 0.839(10) | 2.339(19) | 3.116(3) | 154(3)    | x, y-1, z+1           |

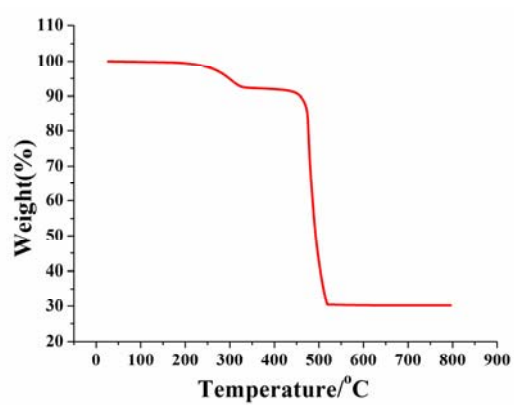

Fig. S1 TG curve of **1**

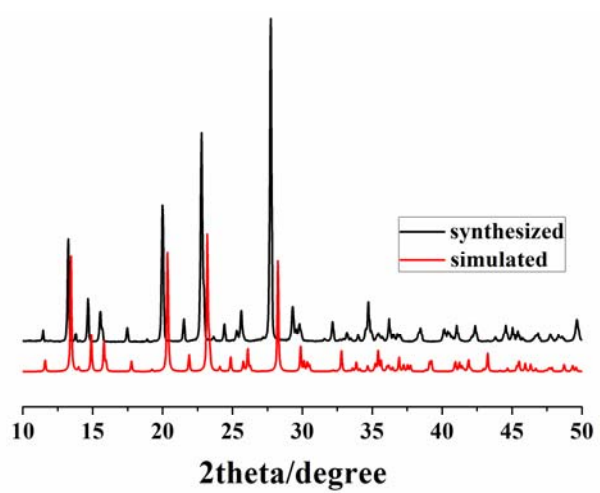

Fig. S2 PXRD pattern of **1**

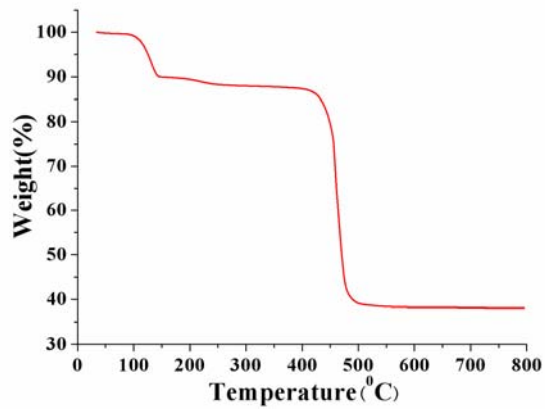

Fig. S3 TG curve of 2

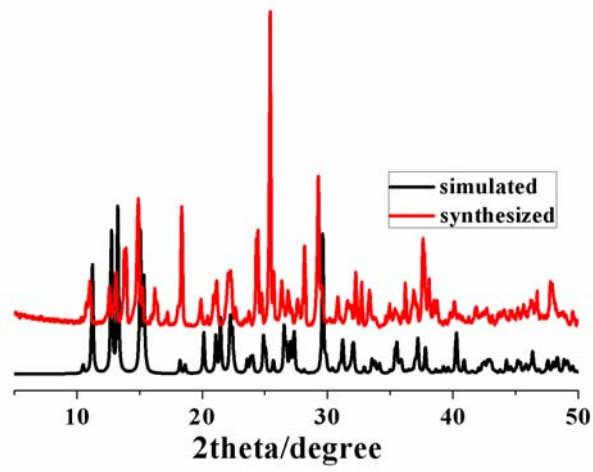

Fig. S4 PXRD pattern of 2

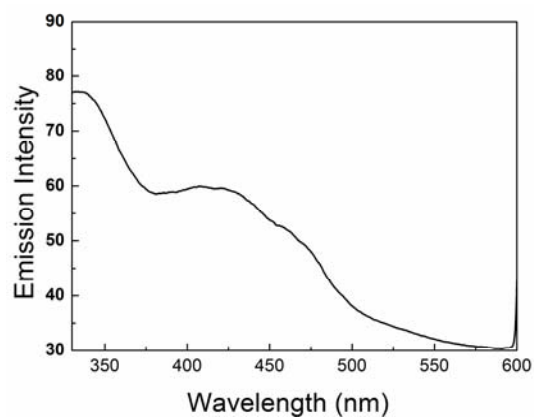

Fig. S5 The fluorescence spectra of **1** ( $\lambda_{\text{ex}} = 310 \text{ nm}$ ) at the solid state at room temperature

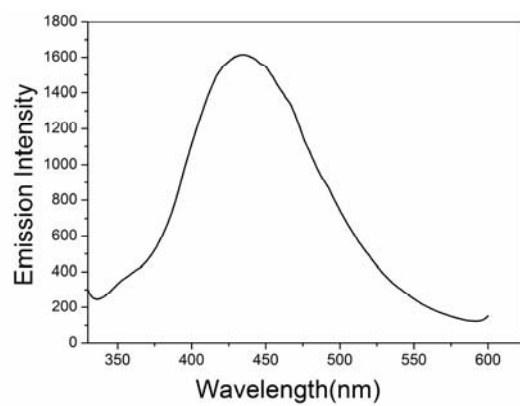

Fig. S6 The fluorescence spectra of **2** ( $\lambda_{\text{ex}}=310 \text{ nm}$ ) at the solid state at room temperature

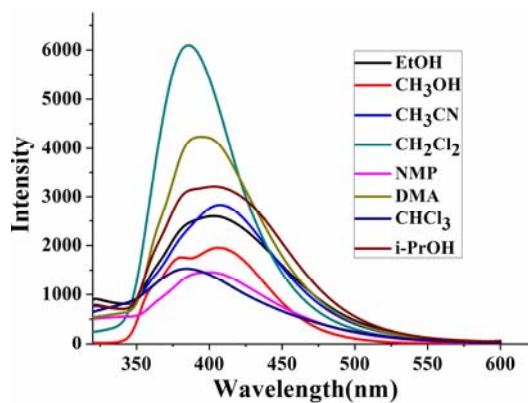

Fig. S7 Emission spectra of **1** in different organic solvent at room temperature.

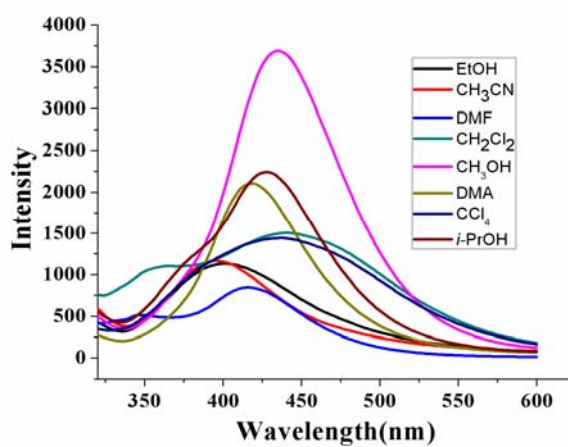

Fig. S8 Emission spectra of **2** in different organic solvent at room temperature



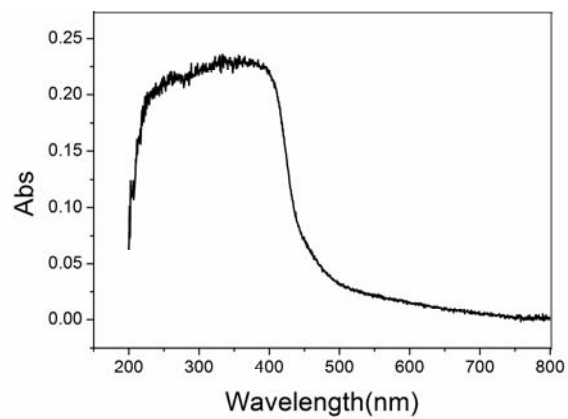

Fig. S9 UV-vis diffuse-reflectance spectra of **1** with BaSO<sub>4</sub> as background

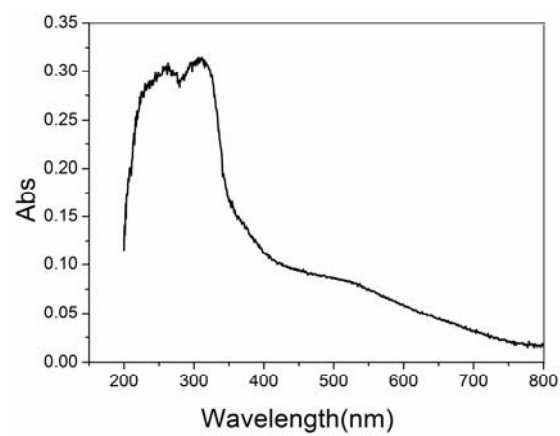

Fig. S10 UV-vis diffuse-reflectance spectra of **2** with BaSO<sub>4</sub> as background

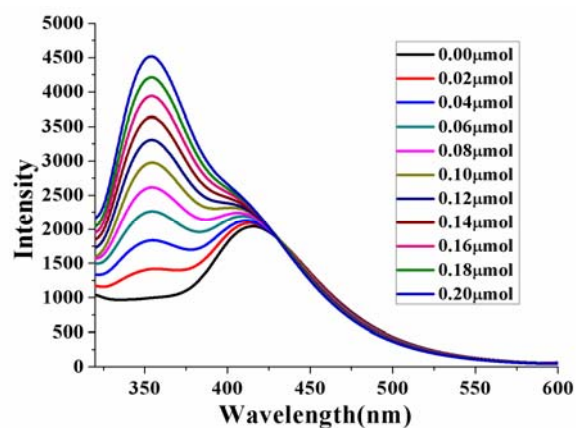

Fig. S11 Fluorescence titration of **1** dispersed in acetonitrile with the addition of different volume of  $10^{-3}$  M acetonitrile solution of *p*-toluidine. The excitation wavelength was 310 nm and fluorescence emission was monitored from 320 nm to 600 nm. The slit width for both excitation and emission were 5 nm.

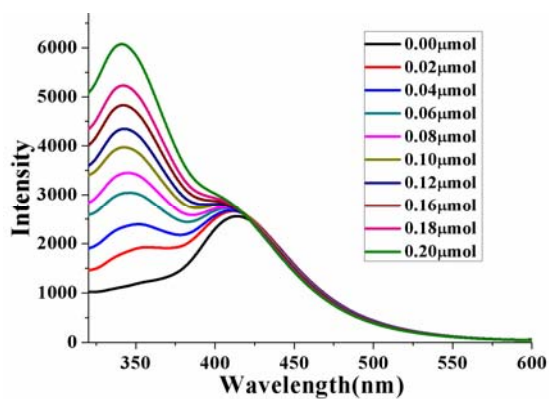

Fig. S12 Fluorescence titration of **1** dispersed in acetonitrile with the addition of different volume of  $10^{-3}$  M acetonitrile solution of aniline. The excitation wavelength was 310 nm and fluorescence emission was monitored from 320 nm to 600 nm. The slit width for both excitation and emission were 5 nm.

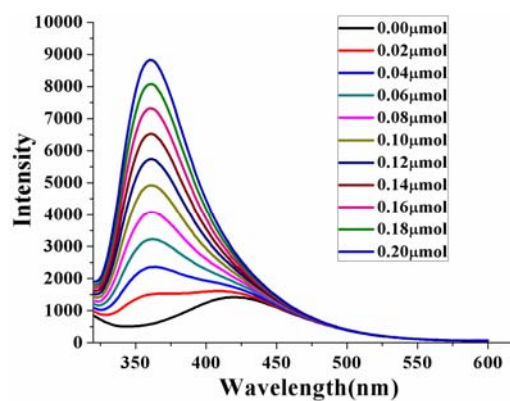

Fig. S13 Fluorescence titration of **2** dispersed in methanol with the addition of different volume of  $10^{-3}$  M methanol solution of *p*-toluidine. The excitation wavelength was 310 nm and fluorescence emission was monitored from 320 nm to 600 nm. The slit width for both excitation and emission were 5 nm.

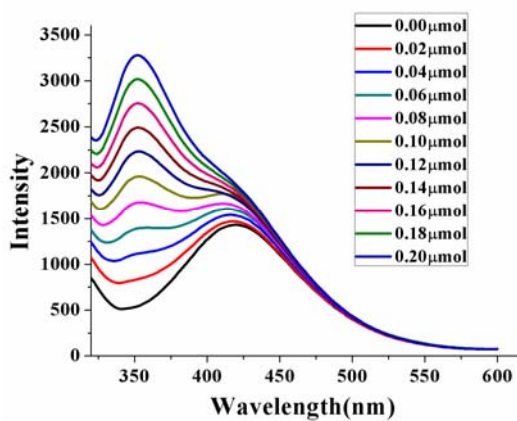

Fig. S14 Fluorescence titration of **2** dispersed in methanol with the addition of different volume of  $10^{-3}$  M methanol solution of aniline. The excitation wavelength was 310 nm and fluorescence emission was monitored from 320 nm to 600 nm. The slit width for both excitation and emission were 5 nm.

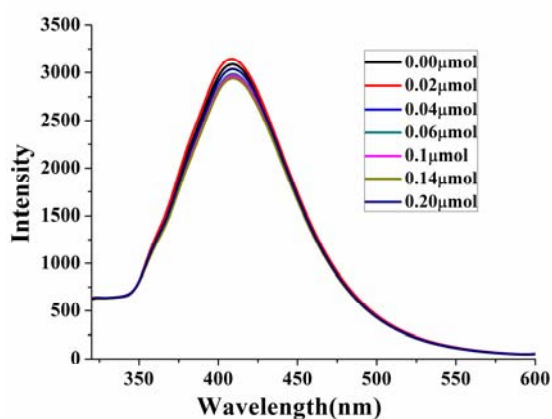

Fig. S15 Fluorescence titration of **1** dispersed in acetonitrile with the addition of different volume of  $10^{-3}$  M acetonitrile solution of triethylamine. The excitation wavelength was 310 nm and fluorescence emission was monitored from 320 nm to 600 nm. The slit width for both excitation and emission were 5 nm.

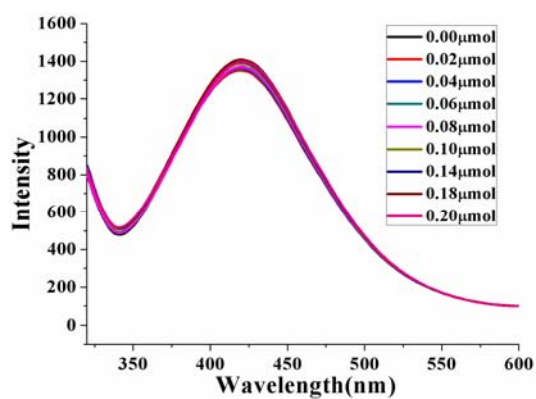

Fig. S16 Fluorescence titration of **2** dispersed in methanol with the addition of different volume of  $10^{-3}$  M methanol solution of triethylamine. The excitation wavelength was 310 nm and fluorescence emission was monitored from 320 nm to 600 nm. The slit width for both excitation and emission were 5 nm.

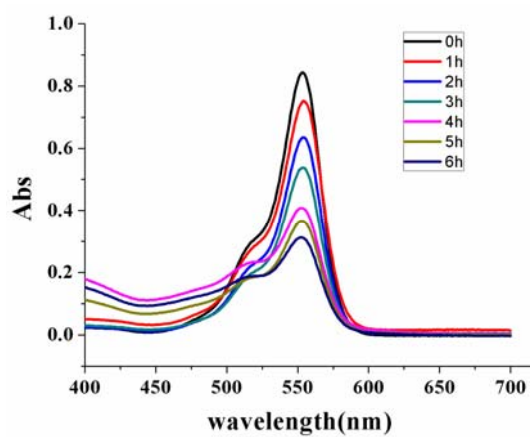

Fig. S17 UV-Vis absorption spectra of RhB solution degraded by **1** in 6h under UV light irradiation.

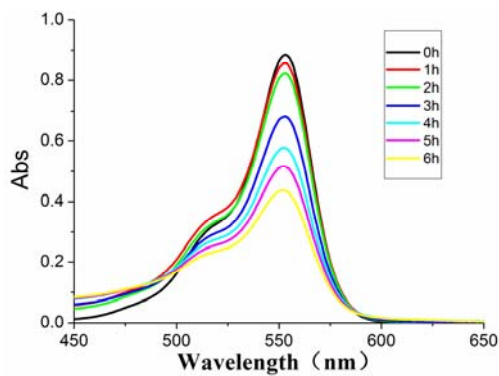

Fig. S18 UV-Vis absorption spectra of RhB solution degraded by **2** in 6h under UV light irradiation.

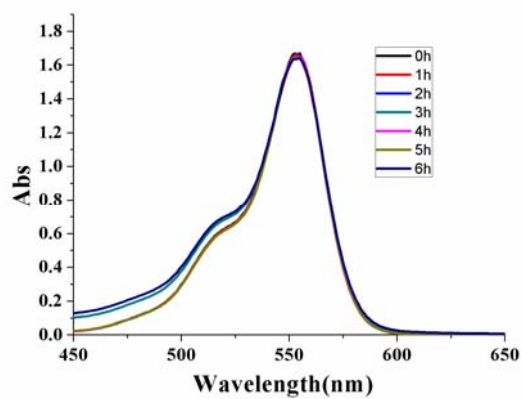

Fig. S19 UV-Vis absorption spectra of RhB solution degraded by **1** in 6h without illumination.

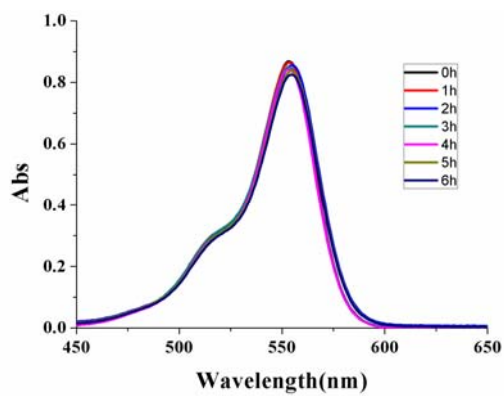

Fig. S20 UV-Vis absorption spectra of RhB solution degraded under UV light irradiation without photocatalysis.

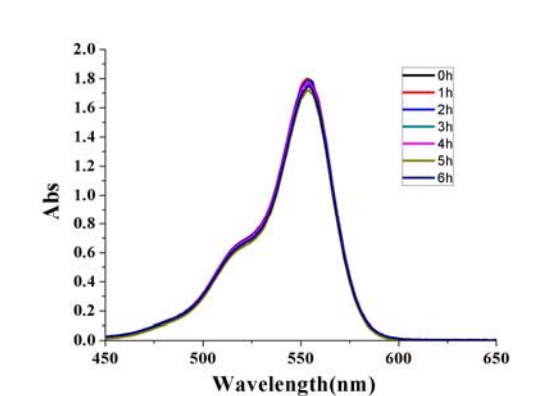

Fig. S21 UV-Vis absorption spectra of RhB solution degraded by **1** in 6h under natural light.

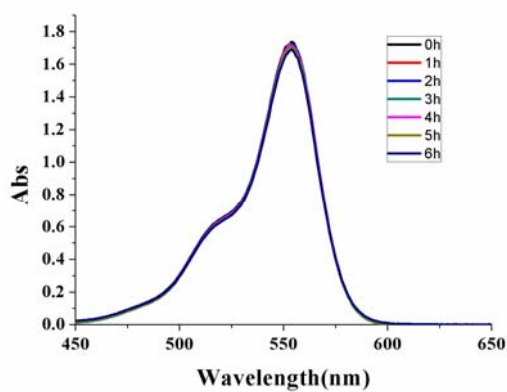

Fig. S22 UV-Vis absorption spectra of RhB solution degraded by **2** in 6h without illumination.

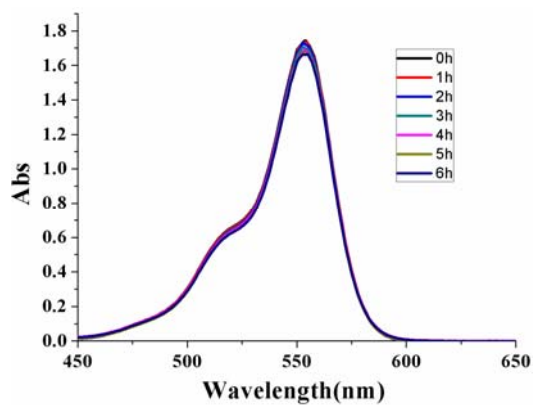

Fig. S23 UV-Vis absorption spectra of RhB solution degraded by **2** in 6h under natural light.

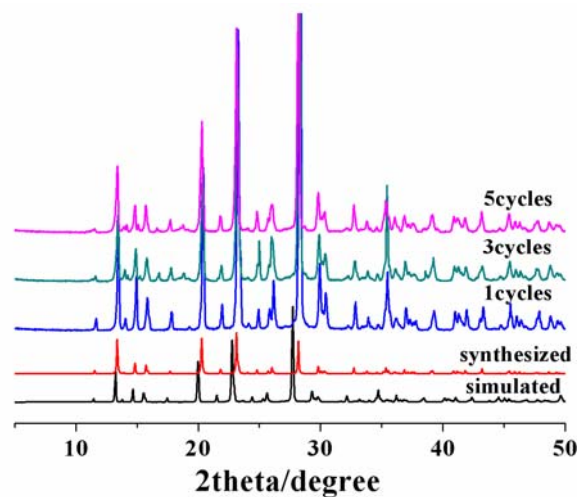

Fig. S24 PXR D patterns of **1** and recycled **1**.

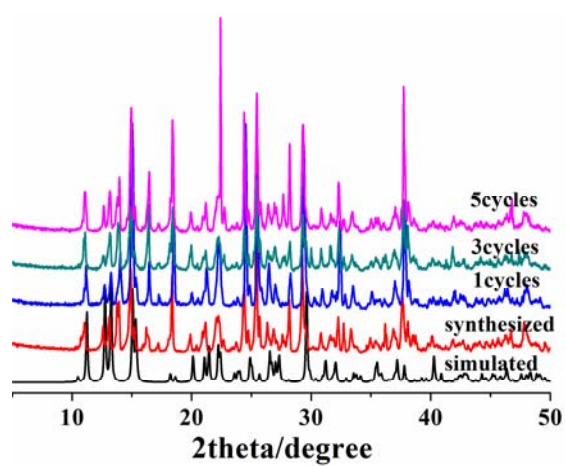

Fig. 25 PXR D patterns of **2** and recycled **2**.

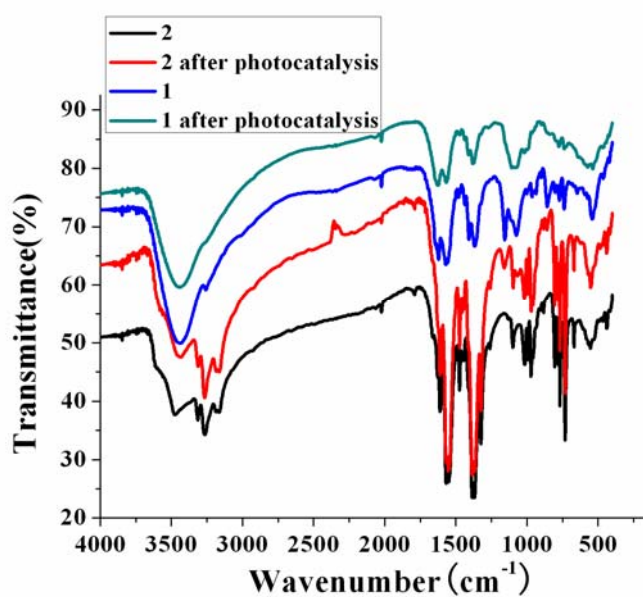

Fig. S26 IR spectra of **1** and **2** before and after photocatalytic reactions.
